# Supplementary material for: Predictors of severe illness in children with multisystem inflammatory syndrome after SARS-CoV-2 infection: a multicentre cohort study
Source: PubMed Central journal article supplement — CMAJ. 2022 Apr 11;194(14):E513–23. doi: 10.1503/cmaj.210873 (PMC9001008; doi:10.1503/cmaj.210873), 2022-04-11
Supplement: 210873-res-6-at.pdf [file 210873-res-6-at.pdf]

Supplementary Figure 3 – Intensive care unit admissions for MIS-C: Analysis of 190 Canadian children by quarter of the year

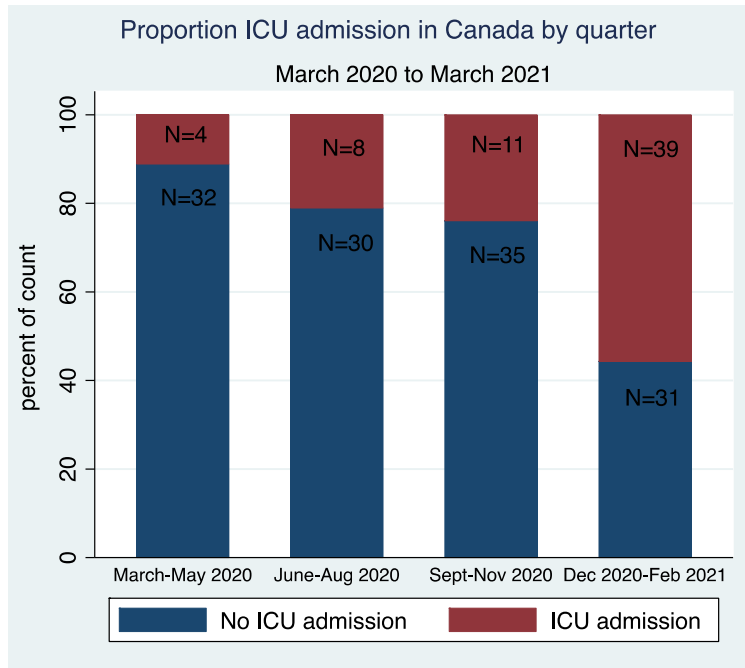

Average Risk Differences for ICU admission in Canada  
Admission time compared to March-May 2020

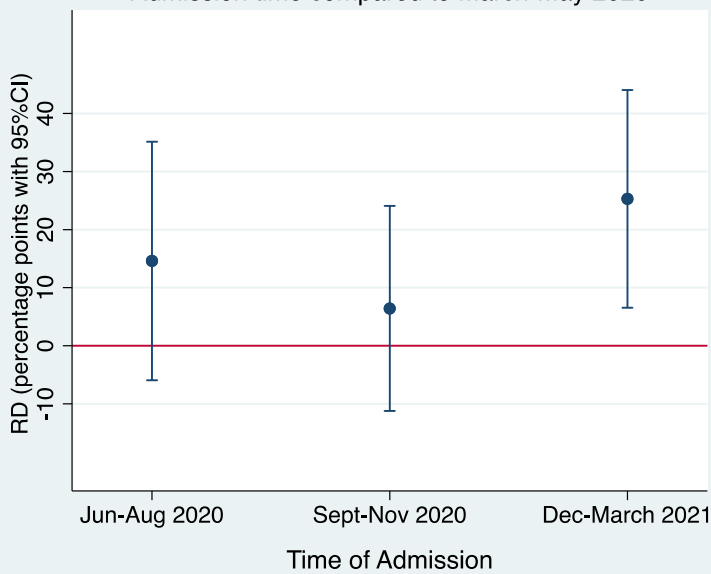

Panel A

Panel

B

Panel A: N is the absolute number of cases in the group. The Y-axis reflects the proportion of total cases admitted per quarter.

Panel B: Association time of admission and severe disease, defined as need for ICU admission in Canada. Average marginal effects are presented with adjusted RDs from the multivariable logistic regression. The reference used for RDs is admission to the hospital

March-May 2020 with a diagnosis of MIS-C. Model is adjusted for sex, age, country, presence of comorbidity, coinfection, treatment, confirmed case status.
